# Supplementary material
Source: Springer Nature journal article supplement (https://www.springermedizin.de/resource/supplementary/13550_2011_13_MOESM4_ESM.pdf/9687402)

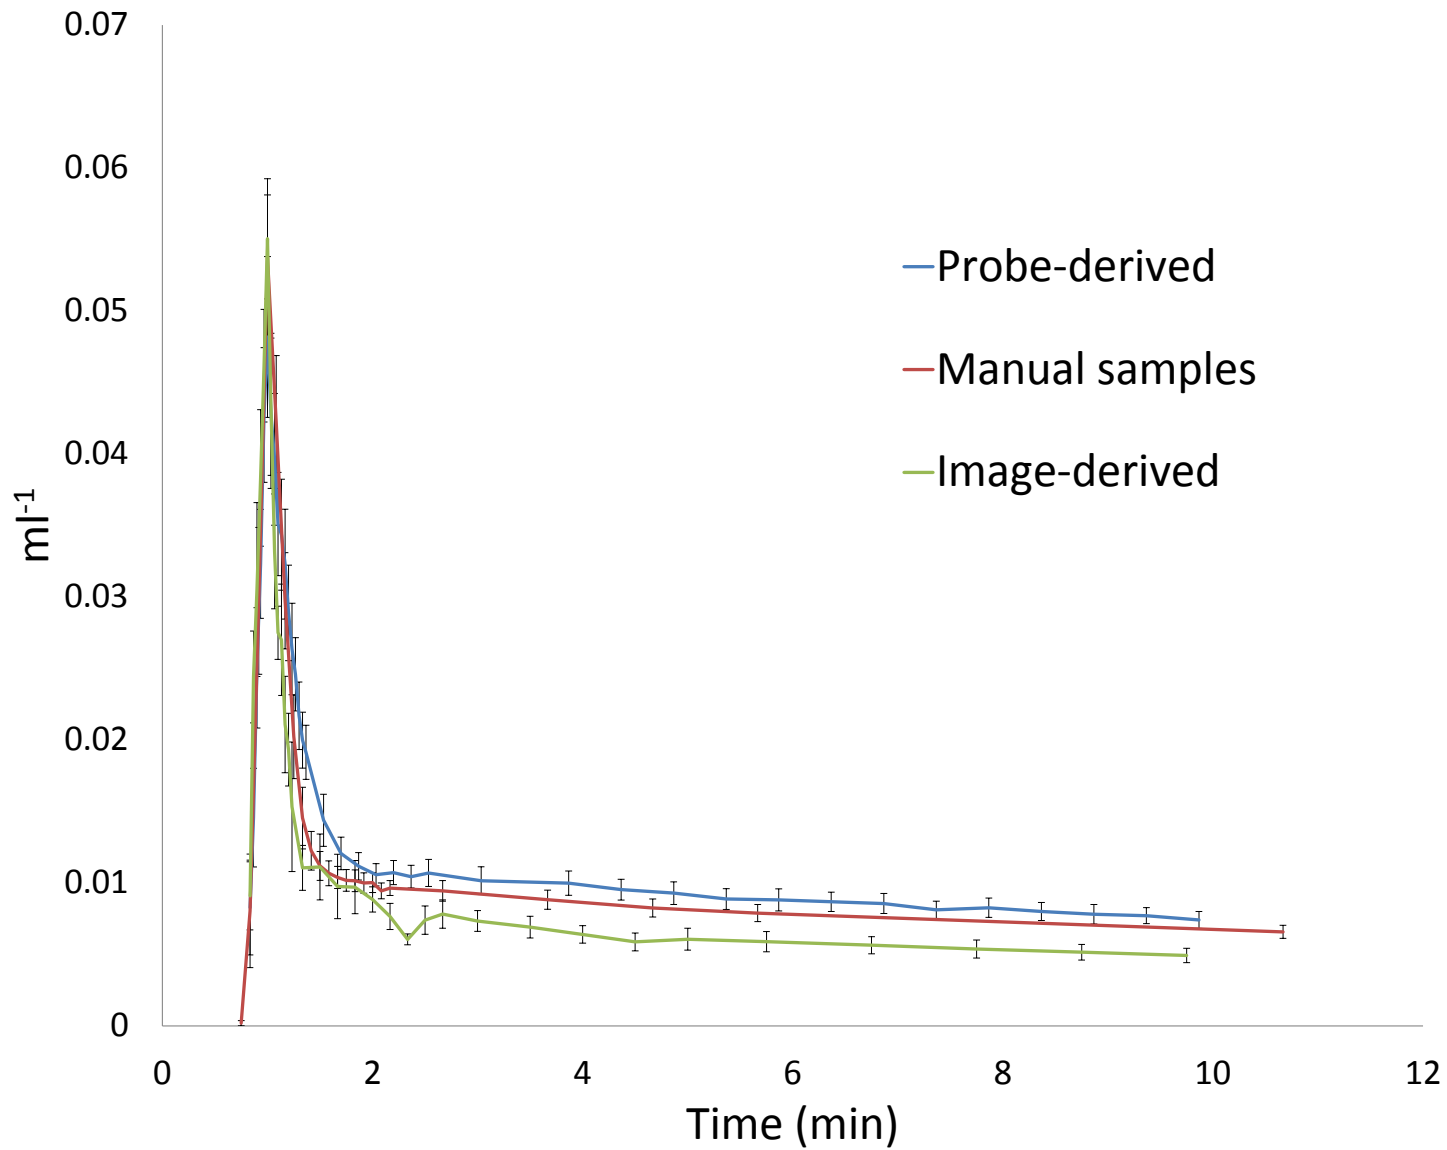

Supplement: MOESM4 [file 9687402]
